# Supplementary material for: Metacommunity patterns of Amazonian Odonata: the role of environmental gradients and major rivers
Source: PeerJ. 2019 May 6;7:e6472. doi: 10.7717/peerj.6472 (PMC6507913; doi:10.7717/peerj.6472)
Supplement: Data S1 — Basin refers to the interfluves; Site is the sampled streamlets. Column names refers to species. [file peerj-07-6472-s001.xlsx]

## Sheet: Odonata survey
	Appendix 1 – Odonata survey Odonata data was derived from Juen and Marco (2012) concerning the identification of endemism centers for Odonata in Brazilian Amazonia. In this paper, they used distributional information (occurrence records) of 392 odonate species in the Amazonian forest and a standardized community-based data. For the aim of our study, we only use the community-based data. In the Gu…

## Sheet: Zygoptera_sample
basin	site	A. apicale	A. kennedii	A. phallicorne	A. dorsale	P. flammeum	A. croceipennis	A. eliptica	A. euphorbia	A. fumigata	A. hasemani	A. indicatrix	A. infumata	A. mollis	A. oculata	A. smithiana	A. subapicalis	A. thespis	A. tinctipennis	C. radians	C. rutilans	C. scintillans	D. atrosanguinea	E. albuquerquei	E. kaxuriana	E. metallica	E. pereirai	E. tariana	E. capilliformis	E. haroldoi	H. amazona	H. amazonica	H. cruentata	H. curvicauda	H. indeprensa	H. laesa	H. moribunda	H. sanguinea	H. westfalli	H. bariai	H. icterops	H. silvarum	H. angustipernne	I. capreolus	M. amalia	M. lucretia	M. ornata	M. amazonica	M. diceras
carajas	carajas 2	0	0	0	0	0	0	20	0	0	0	0	0	0	0	0	0	0	0	0	4	0	0	0	0	0	0	0	0	0	0	0	0	0	7	0	0	0	0	0	0	0	0	0	0	0	0	0	0
carajas	carajas 3	0	0	0	0	0	0	19	0	0	0	0	0	0	0	0	0	0	0	0	1	0	0	0	0	0	0	0	0	0	0	0	0	0	14	0	0	0	0	0	0	0	0	0	0	0	1	0	0
ducke	ducke 10	0	0	0	0	0	0	0	0	0	0	0	0	0	2	0	0	0	0	0	0	7	3	0	0	0	0	0	0	0	0	0	0	0	0	0	2	0	0	0	0	0	0	0	0	1	0	0	0
ducke	ducke 11	0	0	0	0	0	0	0	0	0	0	0	0	0	0	0	0	4	0	0	0	6	1	0	0	0	0	0	0	0	0	4	0	0	0	0	0	0	0	0	0	0	0	0	0	0	0	0	0
ducke	ducke 12	0	0	0	0	0	0	0	0	0	0	0	0	0	3	0	1	0	0	0	0	1	1	0	0	4	0	0	0	0	0	0	0	0	0	0	3	0	0	0	0	2	0	0	0	0	0	0	0
ducke	ducke 2	0	0	0	0	0	0	0	0	0	0	0	0	0	0	0	0	5	0	0	0	7	0	0	0	1	0	0	0	0	0	0	0	0	0	0	2	0	0	0	0	0	0	0	0	0	0	0	0
ducke	ducke 22	0	0	0	0	0	0	0	0	0	2	0	0	0	0	0	0	0	0	0	0	6	1	0	0	4	0	0	0	0	0	0	0	0	0	0	1	0	0	0	0	1	0	1	0	0	0	0	0
ducke	ducke 3	0	0	0	0	0	0	0	0	0	0	0	0	0	0	0	0	2	0	0	0	17	0	0	0	0	0	0	0	0	0	0	0	0	0	0	3	0	0	0	0	3	0	0	0	0	0	0	0
ducke	ducke 4	0	0	0	0	0	0	0	0	0	0	0	0	0	0	0	0	0	0	0	0	16	1	0	0	2	0	0	0	0	0	0	0	0	0	0	1	0	0	0	0	0	0	0	0	0	0	0	0
ducke	ducke 8	0	0	0	0	0	0	0	0	0	0	0	0	0	2	0	0	1	0	0	0	4	1	0	0	0	0	0	0	0	0	0	0	0	0	0	0	0	0	0	0	4	0	0	0	0	0	0	0
ducke	ducke 9	0	0	0	0	0	0	0	0	0	0	0	0	0	5	0	0	4	0	0	0	4	1	0	0	0	0	0	0	0	0	0	0	0	0	0	2	0	0	0	0	0	0	0	0	0	0	0	0
inambari	inambari 1	21	0	0	0	0	0	1	6	0	0	0	0	2	0	0	0	2	0	0	0	0	0	0	0	0	0	20	0	0	0	0	0	9	0	0	0	0	0	28	0	0	0	0	0	0	0	6	0
inambari	inambari 10	0	0	0	0	0	0	0	0	0	0	0	3	0	0	0	0	26	0	0	0	0	0	0	0	0	0	0	0	0	0	0	5	3	0	0	0	0	0	0	0	0	0	0	0	0	0	0	0
inambari	inambari 12	2	0	0	0	0	0	0	0	0	0	0	0	0	0	0	0	14	0	0	0	0	0	0	0	0	0	0	0	0	0	0	0	0	0	0	0	0	0	0	0	0	0	0	0	0	0	0	1
inambari	inambari 13	0	0	0	0	0	0	0	0	0	0	0	0	0	0	0	0	22	0	0	0	0	0	0	0	0	0	0	0	0	0	0	0	0	0	0	0	0	0	0	0	0	0	0	0	0	0	0	0
inambari	inambari 14	14	0	0	0	0	0	0	0	0	0	3	0	0	0	0	0	15	0	0	0	0	0	0	0	0	0	0	0	0	0	0	0	0	0	0	0	0	0	1	0	0	0	0	0	0	0	0	0
inambari	inambari 15	1	0	0	0	0	0	0	0	1	0	0	1	0	3	1	0	9	7	0	20	0	0	0	0	0	0	0	0	0	1	0	0	0	0	0	0	0	0	3	0	0	0	0	4	0	2	0	0
inambari	inambari 16	0	0	0	0	1	0	0	1	1	0	0	2	0	5	0	0	0	14	0	32	0	0	0	0	0	0	0	0	0	0	0	0	0	1	0	0	0	0	17	0	0	0	0	2	0	0	1	3
inambari	inambari 18	11	0	0	0	1	0	0	0	0	0	0	0	0	0	0	0	0	0	0	0	0	0	0	0	0	0	0	0	0	0	0	0	0	0	4	0	0	0	0	0	0	0	0	0	0	0	0	0
inambari	inambari 2	9	0	1	0	0	0	0	2	0	0	0	0	0	0	0	0	0	0	0	0	0	0	0	0	0	0	8	0	0	0	0	0	0	0	0	0	1	0	2	0	0	0	0	0	0	0	7	0
inambari	inambari 3	12	0	7	0	1	0	3	7	0	0	0	0	0	0	0	0	1	0	0	0	0	0	0	0	0	0	27	0	0	0	13	0	3	0	1	0	0	0	26	0	0	0	0	1	0	0	2	0
inambari	inambari 4	0	0	0	0	0	0	0	0	0	0	0	1	0	0	0	0	13	0	0	0	0	0	0	0	0	0	0	0	0	0	0	0	9	0	0	0	0	0	0	0	0	0	0	0	0	0	0	0
inambari	inambari 6	0	0	0	0	0	0	0	0	0	0	0	4	0	0	0	0	3	4	0	0	0	0	1	0	0	0	1	0	0	0	0	0	1	0	0	0	0	5	4	0	0	6	0	1	0	0	0	0
kaxiuana	kaxiuana 10	2	0	0	0	0	0	0	0	0	0	0	0	0	0	0	0	0	0	0	0	0	0	0	0	0	0	0	0	0	0	0	0	0	0	0	0	0	0	0	0	0	0	0	0	0	0	0	0
kaxiuana	kaxiuana 14	0	0	0	0	0	0	0	0	0	0	0	0	0	0	0	0	0	0	0	0	0	0	0	3	0	0	0	0	0	0	0	0	0	0	0	0	0	0	0	0	0	3	0	0	0	0	0	0
kaxiuana	kaxiuana 15	0	0	0	1	0	0	0	0	0	0	0	24	0	0	0	0	0	0	0	0	0	0	0	0	0	0	0	0	0	0	0	0	0	0	0	0	0	0	0	0	0	0	0	0	0	0	0	0
kaxiuana	kaxiuana 19	0	0	0	0	0	2	0	0	0	0	0	0	0	0	0	0	0	0	0	0	0	0	0	0	0	0	0	1	0	0	0	0	0	0	0	0	0	1	0	0	1	0	0	0	0	0	0	0
kaxiuana	kaxiuana 2	0	0	0	0	0	0	0	0	0	0	0	1	0	0	0	0	0	0	0	0	0	8	0	0	1	1	0	0	0	0	0	0	0	0	0	0	0	0	0	0	0	0	0	0	0	0	0	0
kaxiuana	kaxiuana 20	0	0	0	0	0	0	0	0	0	0	0	0	0	0	0	0	0	0	0	0	0	0	0	0	0	0	0	0	0	0	0	0	0	0	0	0	0	2	0	0	0	0	0	0	0	0	0	0
kaxiuana	kaxiuana 3	0	0	0	0	0	0	0	0	0	0	0	0	0	0	0	0	0	0	0	0	0	2	0	0	9	0	0	0	0	0	0	0	0	0	0	0	0	0	0	0	0	0	0	1	0	0	0	0
kaxiuana	kaxiuana 6	0	0	0	0	0	0	0	0	3	0	0	0	0	0	0	0	0	0	0	0	0	11	0	0	0	1	0	1	0	0	0	0	0	0	0	0	0	0	0	0	0	0	0	1	0	0	0	0
tapajos	tapajos 11	0	0	0	0	0	0	0	0	0	0	0	0	0	0	0	0	0	6	0	9	0	3	0	0	0	0	0	10	0	0	0	0	0	0	0	0	0	0	0	0	0	0	0	0	0	0	0	0
tapajos	tapajos 15	0	0	0	0	0	0	2	0	0	0	0	2	0	0	0	0	0	3	0	7	0	0	0	0	0	0	0	0	0	2	0	0	0	0	0	0	0	0	0	0	0	0	0	0	0	0	0	0
tapajos	tapajos 17	0	0	0	0	0	0	0	0	0	0	0	9	0	0	0	0	0	0	0	0	0	0	0	0	0	0	0	3	10	0	0	0	0	0	0	0	0	0	0	1	0	0	0	1	0	0	0	0
tapajos	tapajos 18	0	0	0	0	0	0	1	0	0	0	0	0	0	0	0	0	0	9	0	8	0	0	0	0	0	0	0	9	7	3	0	0	0	0	0	0	0	0	0	0	0	0	0	0	0	0	0	0
tapajos	tapajos 19	0	0	0	0	0	0	1	0	0	0	0	0	0	0	0	0	0	0	0	11	0	0	0	0	0	0	0	4	0	0	0	0	0	5	0	0	0	0	0	0	0	0	0	0	0	0	0	0
tapajos	tapajos 22	0	0	0	0	0	0	0	0	0	0	0	0	0	0	0	0	0	0	11	0	0	0	0	0	0	0	0	1	1	0	0	0	0	0	0	0	0	0	0	0	0	0	0	0	0	0	0	0
tapajos	tapajos 24	0	1	0	0	0	0	0	0	0	0	0	0	0	0	0	0	0	0	0	3	0	1	0	0	0	0	0	2	1	0	0	0	0	17	0	0	0	0	0	0	0	0	0	0	0	0	0	0
tapajos	tapajos 25	0	0	0	0	0	0	0	3	0	0	0	13	0	0	0	0	0	3	16	0	0	2	0	0	0	0	0	0	0	2	0	0	0	0	0	0	0	0	0	0	0	0	0	0	0	0	0	0
tapajos	tapajos 26	0	0	0	0	0	0	3	0	0	0	0	7	0	0	0	0	0	2	0	5	0	2	0	0	0	0	0	0	0	0	0	0	0	8	0	0	0	0	0	0	0	0	0	0	0	0	0	0
tapajos	tapajos 41	0	0	0	0	0	0	0	0	0	0	0	0	0	0	0	0	0	4	0	0	0	0	0	0	0	2	0	16	0	0	0	0	0	0	0	0	0	0	0	2	0	0	0	0	0	0	0	0
tapajos	tapajos 45	0	0	0	0	0	0	3	0	0	0	0	9	0	0	0	0	0	8	0	0	0	0	0	0	0	0	0	0	5	0	0	0	0	0	0	0	0	0	0	0	0	0	0	0	0	0	0	0
tapajos	tapajos 48	0	0	0	0	0	0	0	0	0	0	0	0	0	0	0	0	0	0	0	1	0	4	0	0	0	0	0	2	0	3	0	0	0	0	0	0	0	0	0	0	0	0	0	0	0	0	0	0
tapajos	tapajos 6	0	0	0	0	0	0	0	0	0	0	0	0	0	0	0	0	0	3	0	1	0	0	0	0	0	0	0	5	0	0	0	0	0	0	0	0	0	0	0	0	0	0	0	0	0	0	0	0
tapajos	tapajos 7	0	0	0	0	0	0	0	0	0	0	0	2	0	0	0	0	0	0	24	0	0	0	0	0	0	0	0	0	3	0	0	0	0	0	0	0	0	0	0	0	0	0	0	0	0	0	0	0
tapajos	tapajos 8	0	0	0	0	0	0	0	0	0	0	0	1	0	0	0	0	0	1	5	6	0	2	0	0	0	0	0	0	1	0	0	0	0	0	0	0	0	0	0	0	0	0	0	0	0	0	0	0
tapajos	tapajos 9	0	0	0	0	0	0	0	0	0	0	0	0	0	0	0	0	0	6	4	3	0	4	0	0	0	0	0	1	2	0	0	0	0	0	0	0	0	0	0	0	0	0	0	0	0	0	0	0
[truncated: 21 more columns]

## Sheet: Anisoptera_sample
basin	site	A. argentea	D. esmeralda	E. cannacrioides	E. credula	E. vesiculosa	E. amazonica	E. anatoidea	E. attenuata	E. basalis	E. castanea	E. fusca	E. juliana	E. latimaculata	E. maculosa	E. melanica	E. nigricans	E. ochracea	E. paraguayensis	E. umbrata	F. amazonica	G. auricularis	G. nervosa	I. amazonica	M. simplex	M. artemis	M. eximia	M. hesperis	M. spinifera	M. ungulata	N. berlai	N. flavifrons	O. abbreviata	O. amphinome	O. stenoptera	O. walkeri	O. xanthopleura	O. cultriformis	O. discolor	P. cornelia	P. icteroptera	P. lais	P. mooma	P. thais	P. armata	P. bartica	P. phoenicura	P. intricatus	T. citrina
inambari	inambari 1	0	0	0	0	0	0	0	0	0	0	0	0	0	0	0	0	0	0	0	10	1	1	0	0	0	0	0	2	0	0	0	0	0	0	4	0	0	0	14	10	0	0	9	0	0	0	0	0
inambari	inambari 15	0	1	0	0	0	0	0	0	0	0	0	0	0	0	0	0	0	0	0	0	0	0	0	0	0	0	0	0	0	0	0	0	0	0	0	0	0	0	0	0	0	0	0	0	0	0	0	1
inambari	inambari 17	0	0	0	0	0	0	0	0	0	0	0	0	0	0	0	0	0	0	0	0	0	0	0	0	0	0	0	0	0	0	0	0	0	0	0	0	0	0	17	0	0	0	0	0	0	0	0	0
inambari	inambari 2	0	0	0	0	0	0	0	0	0	0	0	0	0	0	0	0	0	0	1	7	1	2	0	0	0	0	0	0	0	0	0	0	0	0	5	0	1	0	4	0	0	0	0	0	0	0	0	1
inambari	inambari 3	0	0	0	0	0	0	0	0	0	0	0	0	0	0	0	0	0	0	0	0	0	0	0	0	0	0	0	0	0	0	0	2	0	0	3	0	0	0	0	0	58	0	0	0	0	0	0	0
tapajos	tapajos 14	0	0	0	0	0	0	0	0	14	0	2	0	0	0	0	4	0	0	0	0	0	0	0	0	0	0	0	0	0	0	0	0	0	0	0	0	0	0	0	0	0	0	0	0	0	0	0	0
tapajos	tapajos 23	0	3	0	0	0	0	0	0	11	1	31	3	0	0	0	1	0	2	0	0	0	0	0	0	0	0	4	0	0	0	0	0	0	0	0	0	0	8	0	0	0	0	0	0	0	0	1	0
tapajos	tapajos 30	0	1	1	0	0	0	0	0	14	0	4	4	0	0	0	0	0	1	0	0	0	0	0	0	0	0	0	0	0	0	0	0	0	0	0	0	0	11	0	0	0	0	0	0	1	0	0	0
tapajos	tapajos 33	0	0	0	0	0	0	0	0	3	0	9	0	0	0	0	0	0	0	0	0	0	0	0	0	1	0	0	0	0	1	0	0	19	0	0	0	0	5	0	0	15	0	0	0	0	0	0	0
tapajos	tapajos 38	0	0	0	0	1	0	0	0	4	0	21	0	0	0	1	0	0	0	0	0	0	0	0	0	0	0	0	0	2	0	1	0	0	0	0	2	0	7	0	0	0	0	0	0	0	0	0	0
tapajos	tapajos 46	0	0	0	0	0	0	0	0	1	0	10	0	0	0	0	0	0	0	0	1	0	0	0	0	0	0	0	0	0	0	0	0	0	1	0	0	0	3	0	0	0	0	0	0	0	0	0	0
xingu	xingu 12	0	0	0	0	0	0	0	0	3	0	0	0	0	0	0	0	0	0	0	0	0	0	0	0	0	0	0	0	0	0	0	0	0	0	1	1	0	0	0	0	8	0	0	2	0	0	0	0
xingu	xingu 4	0	0	0	0	0	1	0	0	2	0	0	2	0	5	0	0	0	9	0	0	0	0	1	0	0	0	0	0	0	0	0	0	0	0	0	0	0	0	0	0	0	0	0	0	0	0	0	0
xingu	xingu 5	3	0	0	1	0	3	0	0	18	0	2	1	1	8	0	0	0	0	0	9	0	0	0	1	0	0	0	0	0	0	0	0	1	0	0	1	0	0	0	0	10	0	0	0	0	0	0	0
xingu	xingu 6	0	0	0	6	1	0	0	0	11	0	10	0	5	11	0	0	3	1	1	0	0	0	5	3	0	11	0	0	0	0	0	0	0	0	0	8	0	2	0	0	5	4	0	0	0	1	0	0
[truncated: 7 more columns]
